# Supplementary material
Source: publisher site journal article supplement (https://www.spandidos-publications.com/7324/downloadSupplementary)
Supplement: Supplementary file 1 [file downloadSupplementary]

## Sheet: Table S6
Table SVI. Genes intersected.
CLU
TG
S100A13
KRT19
S100A1
CD24
FN1
SLPI
CXCL14
NPC2
TACSTD2
CST6
CAV1
TSC22D1
APLP2
TFF3
ZCCHC12
S100A6
GPX3
SLC34A2
S100A2
SFTPB
CLDN7
CTSB
SDC4
PEBP1
MDK
PAX8
TM4SF1
IGSF1
ARMCX3
SERPINA1
LGALS3
LCN12
PERP
TSPAN1
LCN2
LMO3
PDLIM1
TSHR
CRYAB
PRSS23
DHRS3
CCND1
AGR2
CLIC3
NMB
SLC26A7
CAMK2N1
NTRK2
ASAH1
SOX4
IYD
SORD
DAPK2
ID4
HSP90B1
IGFBP6
MPZL2
DUSP6
TPD52L1
DAPL1
MET
TESC
TNFRSF12A
AK1
PCP4
CTSH
CLDN1
MUC1
SDC2
APOE
ID1
VEGFA
PDLIM4
ARHGAP36
CHI3L1
CITED1
BHLHE41
ELF3
PDZK1IP1
NAPSA
CKB
TIMP1
CHPT1
TMEM98
PDE5A
SLC25A29
PROS1
GDF15
CLDN16
NUPR1
ANXA1
CD63
CCDC80
APOC1
LRRK2
GPX4
HSPA5
CPQ
HSD17B6
PCSK1N
BEX2
TPO
GCSH
GGCT
CLTA
TXNL1
COL8A1
SPINT1
ITGA3
CD55
PRDX1
C4orf48
NELL2
SLC17A5
DPP4
LIPH
PHLDA2
C16orf89
FLRT3
DSTN
LONRF2
MYH10
ANXA3
KCNJ2
BEX4
FRMD3
DIO2
MTCH1
CFH
SMIM1
OCIAD2
RAB34
LAMB3
SERINC2
PDE8B
CD151
BCAM
ATP1A1
SLC26A4
EMP2
S100A16
ST3GAL5
LPCAT2
PAM
DCBLD2
PDIA6
ZFP36L1
PTPRF
DCSTAMP
PCSK2
CFI
RBM47
IGFN1
PLXNB2
FOXE1
NFIA
RCN2
SLC39A10
PON2
GABRB2
MXRA8
SELENBP1
MUC21
MYO6
SLC22A31
TCERG1L
DTX4
CANX
TUSC3
ATP11A
GJA1
FOLR1
CALR
DOCK9
MALL
PPP1R14C
LRP2
SORBS2
SLC26A4-AS1
EPS8
MACROD2
RHOBTB3
ATP8A1
NRP2
PPL
PSD3
IGF2BP2
MED13
SH2D4A
METTL7A
HEBP1
CRABP2
FAM13A
MIR222HG
SNX22
ERRFI1
DUSP5
CCL28
FNDC1
RTN3
CRYBG3
BMP7
INPP5J
PHLDA3
RHOU
CLN5
EGR1
KLK11
ECE1
TMEM50B
FAM20A
ARHGAP5
RRAS
KIF9
TMEM14B
CYBRD1
C1orf115
ECM1
GALNT7
LIMCH1
MCFD2
RGL3
MEGF9
MGAT4B
SLC20A2
SREBF1
MAP3K1
PLPP2
MRPL14
ARL4D
MTUS1
PLD3
ARMCX6
SEC62
GSTM3
QPCT
MORN2
BORCS7
PPP1R14B
ZBED2
LTBP2
AFAP1L2
PTTG1
LSR
ITGA2
HPN
EPHA4
ADAMTS9
GALE
SMARCA1
ARG2
PRICKLE1
PTPN13
CDH6
AGRN
CHD4
DDX17
LIPG
SCEL
GOLGA4
USP54
TPMT
KLK10
NDUFA5
PRR15
NT5E
SLC7A2
RBMS3
XPR1
HMGA2
HSBP1
DYNC1LI2
MLEC
RPS27L
MFGE8
INHBB
LTBP4
TRIM2
HSD17B4
NRIP1
MAP2
LRP4
ZMAT3
SYNE2
TENM1
ADK
POR
CXXC5
SYPL1
SERGEF
HCFC1R1
ENTPD1
IVD
SLC25A23
BASP1
ANK3
ST14
PARP14
EPB41L5
CD320
SDC1
STRADB
GIPC1
NRCAM
SCPEP1
PARP4
DMD
CHST2
MARVELD2
MSRB2
NR2F6
SAMD4A
ARNTL
FRMD4B
CREB3L2
NEBL
MAPK13
PARM1
ALDH9A1
SCG5
ENDOD1
KDELR3
ZFYVE21
RAD23B
MBOAT2
SYCE1L
RAB27A
VASN
EPHX1
ENOSF1
FAM229B
SPATS2
CCND2
IGF2R
HECTD1
LINC00958
SASH1
TIPARP
ALDH1A1
DUOXA2
ZNF680
P4HA2
ALDH7A1
CD109
NINJ1
SPOCK1
CTXN1
ETV1
FLNB
SLIT3
RAPH1
ZMYND11
VGLL4
AGPAT2
DNAJC3
PHYHD1
MYO9A
ABCC3
ATP13A3
TCTN1
CDC27
RNF170
METTL7B
RXRG
C11orf49
NT5C2
RARRES2
ZNF91
IFT88
SNX25
SPRY1
TMEM263
SLC22A18
MIR4458HG
EMP1
MCTP2
TNIK
FBN1
TXNDC15
ZMAT1
SIPA1L2
ERLIN2
NAB2
C11orf1
NT5C3B
RHBDD2
ITK
IL16
SPARC
SIT1
PIM1
ABI3
SELPLG
SH2D1A
TNFSF13B
TMSB10
TRAT1
MSR1
LY86
MAP3K8
PYHIN1
SERPINB9
GLIPR2
ICOS
IRF8
ANXA6
FKBP5
DOCK8
IKZF1
CD96
PYCARD
PDE4B
SH3KBP1
KLF6
RUNX3
TBC1D10C
TAGAP
SOCS3
FCGR2A
ACAP1
SPI1
TNFRSF1B
TUBA4A
TXNIP
CD8A
GZMM
IGSF6
CD27
GLIPR1
SLA
JUNB
RHOH
CD247
NR4A2
EMP3
FGL2
TUBA1A
RGS10
TIGIT
GIMAP7
SDCBP
NFKBIA
GYPC
FXYD5
KLF2
ISG20
PRF1
HLA-B
AREG
TNFRSF4
ITM2A
MEF2C
ZFP36L2
ARL4C
SGK1
FCGR3A
MNDA
CD48
CD3G
GZMK
LST1
ZFP36
RGS2
CYTIP
TNFAIP3
CREM
DUSP2
SH3BGRL3
LSP1
CST7
CCL3L3
HLA-DQB1
TRBC1
CD3E
IL7R
TMSB4X
GPR183
CD2
C1QC
ARHGDIB
C1QB
KLRB1
C1QA
ALOX5AP
IGHG4
TRBC2
CCL4L2
PTPRC
CD3D
FCER1G
TRAC
TSC22D3
CCL5
CD69
TYROBP
IL32
CCL4
SMIM19
PPP6R3
S100A11
DAB2
ABLIM1
ARL4A
PKN2
FBXO9
DUSP23
ITGAL
LBR
AP1S1
GAS6
MANF
ANAPC13
TNFRSF18
KMT5A
ASPH
HACD1
RNASET2
PXK
GNLY
AP000769.1
LGALS9
FABP5
SYNCRIP
SMS
SEMA4D
FAM107B
SEC11C
DNAJB4
TNFAIP8
VASP
TGFBI
PNRC1
SLC43A3
ATF3
PLAU
RAB8B
TMEM123
TGFB1
DSC2
CMTM3
MYADM
TNFSF10
LGALS1
LRRFIP1
HACD4
SLC9A3R1
GBP3
FNBP1
SYTL3
ZNF331
NR3C1
SNHG15
NBEAL1
IDI1
BIN1
TCF4
PGK1
IGHG1
CYCS
ST8SIA4
CSRNP1
ELOVL5
DDIT4
CLIC1
RASGEF1B
EIF4EBP1
MGP
PAIP2
ANKRD12
BCL2
TLE4
PRKACB
TRIM22
MGAT1
CDKN1A
IER5
ATM
MT1F
DUSP4
IKZF3
GBP2
CCND3
SH3BP5
PLAUR
PNP
KLF9
PSMB8
CD44
ATP2B1
CD58
DUSP1
IQGAP2
ALDH2
GADD45B
C15orf48
S100A4
PPP1R15A
TACC1
DDX3X
COMMD8
CCNL1
KLF4
RORA
CFD
PLP2
IFI44L
PMAIP1
RILPL2
CTSS
IFITM3
CYLD
SLC38A1
CXCL8
HERPUD1
TRA2B
SYNGR2
SYNE1
GABARAPL1
BAX
CTSA
AMD1
DNAJB1
NR4A1
MT1X
HNRNPM
SLC38A2
FOSB
PRDM1
FOS
STMN1
MSN
